# Supplementary material for: Comprehensive Analysis Identifies and Validates the Tumor Microenvironment Subtypes to Predict Anti-Tumor Therapy Efficacy in Hepatocellular Carcinoma
Source: Front Immunol. 2022 Jul 18;13:838374. doi: 10.3389/fimmu.2022.838374 (PMC9339643; doi:10.3389/fimmu.2022.838374)
Supplement: Supplementary file 5 [file Table_4.xlsx]

## Sheet: C1_amp_genes.conf_90
cytoband	6p21.1	1q21.3
q value	0.0035463	0.10249
residual q value	0.0035463	0.10249
wide peak boundaries	chr6:43621162-43873607	chr1:155034479-155107200
genes in wide peak	VEGFA	EFNA3
	MAD2L1BP	EFNA4
	GTPBP2	ADAM15
	MRPS18A	DCST1
	RSPH9	LOC100505666

## Sheet: C2_amp_genes.conf_90
cytoband	11q13.3	1q21.3	7q31.2	3q26.31	8q13.3	5p15.33	17q25.3	6p21.1	7q21.3	8q24.21	15q26.3	17q23.1	7q21.11	1q24.3	8q22.3	12q14.1	8q24.22	22q13.1	17p11.2	20q13.2	9p24.2	19q13.11	10p15.1	6q12	1q31.3	2p25.1	4q31.3
q value	1.4686e-12	3.8166e-06	2.5336e-05	0.0064668	0.01212	0.01463	0.012008	0.034031	0.0051334	0.0097333	0.066616	0.056533	0.076879	0.040336	0.059293	0.10919	0.032664	0.12076	0.14217	0.14764	0.18443	0.1973	0.21189	0.1973	0.1971	0.23986	0.23986
residual q value	1.4686e-12	9.4785e-06	0.00013737	0.0064668	0.01212	0.01463	0.015552	0.039017	0.039776	0.045739	0.066616	0.076006	0.076879	0.09872	0.10363	0.10919	0.11511	0.12076	0.14217	0.14764	0.18443	0.1973	0.21189	0.22517	0.23227	0.23986	0.23986
wide peak boundaries	chr11:69573209-69661480	chr1:150665019-150686696	chr7:116699371-116708996	chr3:172541057-172578113	chr8:71425689-71443049	chr5:980905-1287424	chr17:81249696-81357747	chr6:43651953-44009850	chr7:91845241-95519780	chr8:126426522-128343187	chr15:101107423-101259513	chr17:58354093-60902020	chr7:81598495-81622004	chr1:172189043-172215888	chr8:100183273-104849086	chr12:57700511-57763497	chr8:130970244-130986950	chr22:37096825-38782695	chr17:19991890-20165414	chr20:50682186-53832396	chr9:1-6201854	chr19:33278108-33297936	chr10:4985757-5000471	chr6:64591932-64653082	chr1:196428690-198485133	chr2:686939-14192401	chr4:153584652-153597472
genes in wide peak	CCND1	GOLPH3L	MET	TNFSF10	EYA1	TERT	SLC38A10	VEGFA	CALCR	MYC	CHSY1	CA4	LOC100128317	DNM3	ATP6V1C1	CDK4	ADCY8	CSNK1E	SPECC1	KCNG1	DMRT1	CEBPA	AKR1C2	EYS	F13B	E2F6	KIAA0922
						SLC12A7	LINC00482	MRPS18A	KRIT1	POU5F1B		CLTC			DPYS	CYP27B1		H1F0		NFATC2	FOXD4				CFH	HPCAL1
						NKD2	TMEM105	C6orf223	CDK6	PVT1		TRIM37			ODF1	TSPAN31		IL2RB		ZNF217	MLANA				CFHR1	ID2
						SLC6A19		RSPH9	COL1A2	FAM84B		RAD51C			SPAG1	OS9		KCNJ4		DPM1	INSL4				CFHR2	KCNF1
						SLC6A18		LINC01512	CYP51A1	TMEM75		RPS6KB1			KLF10	AGAP2		LGALS1		ATP9A	JAK2				CFHR4	ODC1
						LOC100506688		LOC101929705	GNG11	CASC8		PPM1D			YWHAZ	AGAP2-AS1		LGALS2		ADNP	RFX3				CFHR3	RPS7
						MIR4635			GNGT1	CASC11		MTMR4			FZD6	MIR6759		MFNG		MOCS3	RLN1				CRB1	RRM2
						CTD-3080P12.3			PEX1	MIR1205		APPBP2			RIMS2	MIR6759		POLR2F		BCAS4	RLN2				LHX9	SOX11
									PON1	MIR1206		PPM1E			DCAF13			RAC2		ZFP64	SLC1A1				CFHR5	ADAM17
									PON2	MIR1207		RNFT1			RNF19A			SOX10		SALL4	SMARCA2				NEK7	TPO
									PON3	MIR1204		TUBD1			PABPC1			SSTR3		PARD6B	VLDLR				DENND1B	TSSC1
									MTERF1	MIR1208		PTRH2			LRP12			PLA2G6		TSHZ2	PUM3				ASPM	PXDN
									TFPI2	CCAT1		BCAS3			RRM2B			GALR3		FAM65C	RCL1				KCNT2	KLF11
									SGCE	PCAT1		RNF43			ZNF706			PICK1		MIR3194	DMRT2				ZBTB41	ASAP2
									AKAP9	CCAT2		SMG8			UBR5			GTPBP1		ADNP-AS1	INSL6				C1orf53	TAF1B
									BET1	PRNCR1		PRR11			AZIN1			JOSD1		LINC01429	KANK1				MIR4735	ITGB1BP1
									PEG10	CASC21		TEX14			BAALC			DNAL4		LINC01524	RANBP6					ROCK2
									ERVW-1	CASC19		HEATR6			GRHL2			DDX17		LOC101927770	CD274					GREB1
									ASB4	PCAT2		DHX40			SLC25A32			KDELR3		LOC105372672	AK3					RNF144A
									ANKIB1			VMP1			DCSTAMP			TRIOBP			SPATA6L					PDIA6
									SAMD9			USP32			NACAP1			CDC42EP1			CDC37L1					YWHAQ
									PPP1R9A			HSF5			NCALD			DMC1			PLGRKT					MYT1L
									VPS50			C17orf64			CTHRC1			GCAT			CBWD1					LPIN1
									GATAD1			C17orf47			BAALC-AS2			SLC16A8			RIC1					NTSR2
									CASD1			GDPD1			ANKRD46			SH3BP1			DMRT3					TRIB2
									RBM48			SKA2			SNX31			MAFF			ERMP1					GRHL1
									SAMD9L			YPEL2			FLJ42969			CBY1			PDCD1LG2					TRAPPC12
									HEPACAM2			LOC388406			MIR548A3			SUN2			DOCK8					CPSF3
									FAM133B			MIR21			MIR3151			TMEM184B			GLIS3-AS1					SNTG2
									LRRD1			MIR301A			BAALC-AS1			GGA1			C9orf66					ADI1
									MIR489			WFDC21P			AZIN1-AS1			CYTH4			KIAA2026					ALLC
									CYP51A1-AS1			TBC1D3P1-DHX40P1			MIR4471			CARD10			KCNV2					KIDINS220
									MIR653			LOC653653			MIR5680			EIF3L			GLIS3					COLEC11
									MIR1285-1			SCARNA20			UBR5-AS1			TOMM22			VLDLR-AS1					NOL10
									MIR4652			MIR454			MIR7705			PDXP			PLPP6					RSAD2
									LOC101927497			MIR4729			LOC104054148			NOL12			MIR101-2					CMPK2
									LOC105375396			MIR4737						BAIAP2L2			FAM138A					MBOAT2
									LOC105375401			SEPT4-AS1						C22orf23			FAM138C					C2orf50
												LINC01476						MICALL1			WASH1					PQLC3
												LOC101927755						ELFN2			DDX11L5					LINC01105
												LOC105371849						C1QTNF6			MIR1302-2					CYS1
																		ANKRD54			MIR1302-9					ATP6V1C2
																		TMPRSS6			MIR1302-10					RNASEH1
																		LOC400927			MIR1302-11					IAH1
																		FAM227A			MIR4665					FLJ33534
																		MIR658			PGM5P3-AS1					LINC00298
																		MIR659			LINC01231					LINC00299
																		LOC100506271			RFX3-AS1					LINC01115
																		MIR4534			CDC37L1-AS1					C2orf48
																		MIR5096			LINC01230					RNF144A-AS1
																		LOC101927051								LOC400940
																		MIR6820								LINC00487
																		LOC400927-CSNK1E								LINC01249
																		LOC105373031								DCDC2C
																		SNORA92								MYT1L-AS1
																										SNORA80B
																										MIR548S
																										MIR4261
																										MIR3125
																										MIR4262
																										MIR3681
																										LINC01304
																										RNASEH1-AS1
																										LOC100506274
																										ID2-AS1
																										MIR3681HG
																										LOC100506474
																										MIR4429
																										LINC00570
																										LOC101060385
																										LOC101060391
																										LINC01250
																										LINC01247
																										LOC101929452
																										LOC101929551
																										LOC101929567
																										LOC101929715
																										LOC101929733
																										LOC101929882
																										MIR7158
																										MIR7515
																										LINC01248
																										MIR7515HG
																										LINC01246
																										NRIR
																										LOC105373394

## Sheet: C3_amp_genes.conf_90
cytoband	11q13.3	1q21.3	6p21.1	1q21.3	5p15.33	13q34	8q24.13	17q25.3	3q26.31	8q11.1	13q32.3	5q35.3	6p25.2	4p14	19q13.11	2p24.1	17p11.2	2q31.2	6q12	20q13.13	1q42.2	8p11.21	2q33.1	20q13.33	8q22.2	2q33.2	6q13	9q34.3	11q13.3	20q13.2	14q11.2	6p22.3	20q11.22	1q31.3	17q21.2	12q15
q value	6.378e-10	1.5331e-08	2.0155e-05	5.9078e-08	0.00012264	6.9749e-06	0.00012264	0.0004988	0.00090184	0.0021568	3.3884e-05	0.0076177	0.0047526	0.016185	0.016963	0.022927	0.023969	0.014818	0.011887	0.033843	0.036901	0.023969	0.016963	0.038577	0.0049115	0.02854	0.071702	0.10072	0.00094784	0.065932	0.13603	0.061483	0.14129	0.18148	0.18815	0.20165
residual q value	1.0334e-09	1.1131e-05	2.3905e-05	3.5408e-05	0.00012264	0.00020438	0.0004988	0.0004988	0.00090184	0.0031128	0.0034717	0.0076177	0.0097285	0.016185	0.016963	0.022927	0.023969	0.024993	0.026039	0.035338	0.036901	0.036901	0.052091	0.075348	0.07633	0.082285	0.10072	0.10072	0.12565	0.13081	0.13603	0.14129	0.14129	0.18148	0.18815	0.20165
wide peak boundaries	chr11:69431766-69449601	chr1:154998687-155048996	chr6:43801094-43810653	chr1:150734331-150750318	chr5:956557-1020238	chr13:108409282-114364328	chr8:114539587-135080710	chr17:82056197-82100980	chr3:172464453-172567701	chr8:43078230-46552239	chr13:92740172-104688637	chr5:179419646-179513194	chr6:1-3184764	chr4:39473455-39502648	chr19:33202104-33217995	chr2:20144268-20156844	chr17:20839308-20859471	chr2:177250185-177268259	chr6:63368281-64015179	chr20:50354095-50374045	chr1:228309483-248956422	chr8:39874933-40680023	chr2:200682521-200703216	chr20:61781075-62511373	chr8:83542460-121669952	chr2:203536596-203601011	chr6:69561622-69647270	chr9:136797279-136806777	chr11:69885179-69967621	chr20:53929551-54298741	chr14:1-25300715	chr6:19706177-23229829	chr20:34302613-34329302	chr1:193576531-200339252	chr17:42620416-42656050	chr12:68770867-68855306
genes in wide peak	LOC102724265	ZBTB7B	VEGFA	CTSS	NKD2	ATP4B	ADCY8	FASN	TNFSF10	FNTA	DCT	RUFY1	BPHL	UGDH	LRP3	SDC1	CCDC144NL	NFE2L2	PTP4A1	LINC01271	ACTA1	IDO1	AOX3P-AOX2P	CDH4	ANGPT1	RAPH1	LMBRD1	CCDC183	FGF3	CYP24A1	hsa-mir-1201	E2F3	AHCY	F13B	TUBG2	CPM
		DCST2			LOC100506688	COL4A1	ANXA13	GPS1		POMK	GPR183		SERPINB1	LIAS	SLC7A10			MIR3128	PHF3		ACTN2	C8orf4		LAMA5	ATP6V1C1			CCDC183-AS1		PFDN4	ANG	ID4		NR5A2		MDM2
		DCST1				COL4A2	EXT1	DUS1L		HGSNAT	ERCC5		FOXF2	LOC401127					EYS		ADSS	ZMAT4		PSMA7	OSGIN2					BCAS1	APEX1	PRL		CFH		LOC100130075
		LOC100505666				F7	HAS2	SNORD134		POTEA	FGF14		FOXC1								AGT	IDO2		RPS21	CA1					MIR4756	BCL2L2	SOX4		CFHR1
						F10	KCNQ3				GPC5		GMDS								CHML			TAF4	CA2						CEBPE	CDKAL1		CFHR2
						GAS6	MYC				GPR18		IRF4								LYST			OSBPL2	CA3						CMA1	MBOAT1		PTPRC
						ING1	NDUFB9				IPO5		NQO2								CHRM3			ADRM1	CALB1						LTB4R	HDGFL1		CFHR4
						LAMP1	NOV				PCCA		SERPINB6								FH			HRH3	RUNX1T1						CTSG	CASC15		CFHR3
						GRK1	TNFRSF11B				DNAJC3		SERPINB9								GALNT2			SS18L1	CDH17						DAD1	NBAT1		CRB1
						SOX1	ENPP2				RAP2A		TUBB2A								GNG4			MTG2	COX6C						GZMH	LOC100506885		LHX9
						TFDP1	POU5F1B				SLC10A2		RIPK1								HNRNPU			CABLES2	DECR1						GZMB	LINC00581		CFHR5
						CUL4A	PVT1				SLC15A1		EXOC2								KCNK1			GATA5	DPYS						HNRNPC	LOC105374972		ATP6V1G3
						IRS2	RAD21				TPP2		WRNIP1								LGALS8			RBBP8NL	E2F5						MMP14			NEK7
						PROZ	ST3GAL1				ZIC2		DUSP22								MTR			LSM14B	EXT1						MYH6			DENND1B
						ARHGEF7	SLA				STK24		FOXQ1								NID1			MIR1257	GEM						MYH7			ASPM
						CDC16	SNTB1				CLDN10		HUS1B								RAB4A			MIR3195	HAS2						NEDD8			KCNT2
						TUBGCP3	SQLE				ITGBL1		LINC01600								RGS7			MIR4758	EIF3E						NFATC4			ZBTB41
						RASA3	TAF2				TM9SF2		SERPINB9P1								RYR2			LAMA5-AS1	KCNS2						PNP			C1orf53
						MYO16	TG				GPC6		LOC285766								TARBP1				MATN2						NRL			MIR181B1
						ATP11A	TRPS1				MBNL2		LINC01622								TBCE				MMP16						OXA1L			MIR181A1
						MCF2L	COL14A1				FARP1		MYLK4								GPR137B				NBN						PCK2			MIR181A1HG
						TMCO3	EIF3H				ABCC4		LINC01011								TSNAX				NOV						PSMB5			MIR4735
						DCUN1D2	WISP1				SOX21		HTATSF1P2								ZNF124				ODF1						PSME1			LINC01222
						ANKRD10	MTSS1				DZIP1		LINC00266-3								HIST3H3				TNFRSF11B						PSME2			LINC01221
						RAB20	KIAA0196				DOCK9		LOC100507194								GNPAT				ENPP2						RABGGTA
						NAXD	HHLA1				TGDS		GMDS-AS1								KMO				POLR2K						RNASE1
						PCID2	TRIB1				OXGR1		MIR4645								EXO1				RAD21						RNASE2
						UPF3A	NDRG1				BIVM		LOC101927691								GGPS1				RPL30						RNASE3
						CARS2	COLEC10				UGGT2		FOXCUT								TOMM20				SDC2						RNASE4
						GRTP1	RNF139				KDELC1		LOC101927730								URB2				SNTB1						RNASE6
						ADPRHL1	ZHX1				TMTC4		LOC101927759								CEP170				SPAG1						SALL2
						TEX29	ZHX2				ZIC5		MIR6720								AKT3				STK3						TEP1
						SPACA7	EFR3A				GGACT										ZBTB18				TAF2						TGM1
						LINC00567	LRRC6				TEX30										SPHAR				KLF10						PABPN1
						LINC00346	MTBP				METTL21EP										CAPN9				TRHR						AP1G2
						CHAMP1	MRPL13				RNF113B										SDCCAG8				TRPS1						SLC7A7
						TMEM255B	ATAD2				GPR180										COG2				COL14A1						CPNE6
						ATP11AUN	ASAP1-IT1				CLYBL										RBM34				UQCRB						TOX4
						LINC00452	ASAP1				METTL21C										ABCB10				YWHAZ						REC8
						GAS6-AS1	PHF20L1				NALCN										OPN3				FZD6						PARP2
						COL4A2-AS2	FAM49B				HS6ST3										TRIM58				EIF3H						DHRS2
						LINC00552	TRMT12				FGF14-IT1										AHCTF1				RIPK2						EFS
						MCF2L-AS1	WDYHV1				FGF14-AS2										OR1C1				CPNE3						IRF9
						LINC00403	GSDMC				UBAC2										OR2M4				CCNE2						PRMT5
						LOC100506016	ZFAT				CCDC168										OR2L2				EBAG9						TM9SF1
						GAS6-AS2	DEPTOR				MIR623										OR2L1P				EMC2						EDDM3A
						MIR4502	DSCC1				FKSG29										OR2T1				RIMS2						DHRS4
						MIR548AR	DERL1				DNAJC3-AS1										TAF5L				PTDSS1						RIPK3
						LINC00565	TATDN1				UBAC2-AS1										DISC2				RIDA						SUPT16H
						GRTP1-AS1	UTP23				MIR4306										DISC1				CPQ						ACIN1
						LINC00454	C8orf76				MIR3170										DESI2				COLEC10						KHNYN
						COL4A2-AS1	FAM83A				SOX21-AS1										SCCPDH				POP1						SLC7A8
						ATP11A-AS1	MED30				BIVM-ERCC5										TRIM17				WWP1						NGDN
						ARHGEF7-AS1	TBC1D31				MIR2681										ARID4B				ZFPM2						LRP10
						ARHGEF7-AS2	HPYR1				MIR4501										EGLN1				RAD54B						TINF2
						MYO16-AS1	MAL2				MIR4705										MAP10				DCAF13						OR10G3
						LOC101060553	FBXO32				DOCK9-AS2										KIF26B				RNF19A						OR10G2
						LINC00676	CCDC26				LINC00554										HEATR1				KIAA1429						OR4E2
						LINC00368	ZNF572				LINC00557										ZNF692				RGS22						OR4E1
						LINC00354	TMEM71				GPC6-AS1										NUP133				SNORA72						CIDEB
						LINC01070	FER1L6-AS2				GPC6-AS2										ERO1B				PABPC1						CHMP4A
						LOC101928730	TMEM65				CLYBL-AS2										FMN2				KCNV1						STXBP6
						LINC01043	LINC00964				FGF14-AS1										ZNF695				MTBP						SLC39A2
						LOC101928841	FAM84B				DOCK9-AS1										SIPA1L2				MRPL13						EMC9
						MIR8073	FAM91A1				LINC00411										ZP4				LRP12						ZNF219
						MIR8075	SLC30A8				CLDN10-AS1										RHOU				RRM2B						GMPR2
						LINC01044	NSMCE2				PCCA-AS1										TFB2M				MTERF3						SLC22A17
						LINC00399	KLHL38				NALCN-AS1										GREM2				RMDN1						HAUS4
						LINC00431	SAMD12				LINC00359										SMYD3				ZNF706						C14orf119
						LINC00396	MIR30B				LOC101927248										ARV1				UBR5						RNF31
						LINC01054	MIR30D				LOC101927284										TTC13				AZIN1						RBM23
						F10-AS1	FER1L6-AS1				LOC101927437										PGBD5				OTUD6B						DHRS4-AS1
						LOC105370369	AARD				CLYBL-AS1										ZNF669				PDP1						OSGEP
							NCRNA00250				LINC01232										ZNF672				CNGB3						ARHGEF40
							SAMD12-AS1				LINC00456										PCNX2				ESRP1						METTL3
							ZFAT-AS1				LINC00363										SH3BP5L				OXR1						LTB4R2
							HAS2-AS1				LINC01309										OR2L5				LAPTM4B						SDR39U1
							TMEM75				LINC01039										OR2G3				RBM12B-AS1						RPGRIP1
							RAD21-AS1				LOC105370333										OR2G2				TMEM55A						NDRG2
							FER1L6				LINC00449										OR2C3				SYBU						NYNRIN
							MIR548D1														TRIM11				INTS8						HOMEZ
							CASC8														SPRTN				ENY2						CHD8
							LINC00977														OBSCN				NECAB1						CCNB1IP1
							OC90														NTPCR				DEPTOR						C14orf93
							LINC00861														EFCAB2				DSCC1						ABHD4
							FAM83A-AS1														MLK4				PLEKHF2						EDDM3B
							CASC11														ZNF496				NIPAL2						CDH24
							MIR1205														C1orf198				BAALC						METTL17
							MIR1206														HIST3H2A				GRHL2						IL25
							MIR1207														ZNF670				SLC25A32						THTPA
							MIR1204														NLRP3				DCSTAMP						OR4K5
							MIR1208														COX20				NACAP1						OR11H2
							MIR3686														CCSAP				NCALD						OR4K1
							MIR548AA1														OR2M5				UTP23						IPO4
							MIR3610														OR2M3				NUDCD1						DCAF11
							CCAT1														OR2T12				LRRCC1						OR4K15
							ASAP1-IT2														OR14C36				TSPYL5						JPH4
							ZHX1-C8orf76														OR2T34				PSKH2						RNASE7
							MIR4662A														OR2T10				MED30						RAB2B
							MIR4662B														OR2T4				TMEM67						AJUBA
							MIR4663														OR2T11				MTDH						ZFHX2
							PCAT1														OR2B11				PKHD1L1						RPPH1
							MIR5194														WDR64				TP53INP1						CARMIL3
							LINC00536														C1orf131				MAL2						PPP1R3E
							CCAT2														EDARADD				CSMD3						TMEM55B
							PRNCR1														HIST3H2BB				SLC26A7						TTC5
							LOC101927513														SLC35F3				CTHRC1						DHRS1
							LOC101927543														B3GALNT2				OSR2						CMTM5
							LOC101927588														GCSAML				FAM92A1						RNASE11
							RNF139-AS1														GCSAML-AS1				NDUFAF6						TPPP2
							LOC101927657														LINC01341				ABRA						RNASE8
							LINC00824														EXOC8				DCAF4L2						MRPL52
							LOC101927798														LOC149373				RALYL						PSMB11
							LOC101927822														RNF187				BAALC-AS2						OR4K14
							LOC101927845														CNST				ANKRD46						OR4L1
							MIR548AZ														PLD5				C8orf37						OR11H6
							MIR6844														C1orf100				VPS13B						KLHL33
							MIR7848														OR2T6				SLC7A13						MDP1
							CASC21														LOC255654				TMEM74						FITM1
							CASC19														C1orf101				CNBD1						REM2
							PCAT2														PGBD2				SLC30A8						NOP9
							LINC01151														OR2L13				SNX31						ADCY4
							LOC105375713														OR14A16				TMEM64						LOC254028
							LOC105375734														VN1R5				ERICH5						LINC00641
							LOC105375744														LOC339529				ATP6V0D2						TSSK4
							LOC105375773														LINC01139				TRIQK						DHRS4L2
																					OR6F1				DPY19L4						SNORD8
																					OR2W3				FBXO43						RNASE10
																					OR2T8				RSPO2						OR6S1
																					OR2T3				CA13						OR4N2
																					OR2T29				C8orf87						OR4K2
																					IRF2BP2				RBM12B						OR4K13
																					FAM89A				GDF6						OR4K17
																					COA6				C8orf59						OR4N5
																					C1orf229				SAMD12						OR11G2
																					OR2M1P				FLJ46284						OR11H4
																					OR11L1				FLJ42969						RNASE9
																					OR2L8				AARD						OR5AU1
																					OR2AK2				SAMD12-AS1						POTEG
																					OR2L3				HAS2-AS1						MIR208A
																					OR2M2				LINC01298						OR11H12
																					OR2T33				LINC00535						RNASE13
																					OR2M7				RAD21-AS1						OR4Q3
																					OR2G6				MIR548A3						OR4M1
																					OR2T2				MIR599						RNASE12
																					OR2T5				MIR875						DUXAP10
																					OR14I1				C8orf88						POTEM
																					OR2T27				LRRC69						LOC642426
																					OR2T35				LOC100132813						LINC01296
																					TRIM67				REXO1L2P						ECRP
																					MAP1LC3C				LOC100288748						TMEM253
																					BECN2				MIR1273A						CBLN3
																					OR2W5				MIR2053						SNORD9
																					OR13G1				MIR3150A						DHRS4L1
																					DUSP5P1				MIR3151						SNORD126
																					SNRPD2P2				BAALC-AS1						MIR208B
																					MT1HL1				LOC100500773						PRMT5-AS1
																					RPS7P5				MIR3150B						RNF212B
																					LYPD8				MIR3610						LOC100508046
																					SNORA14B				OTUD6B-AS1						NEDD8-MDP1
																					LINC01347				AZIN1-AS1						BCL2L2-PABPN1
																					LINC01348				MIR378D2						MIR4707
																					BTNL10				MIR4661						POTEH-AS1
																					LOC100130331				MIR4471						BMS1P17
																					RNA5S1				C8orf37-AS1						LOC101926933
																					RNA5S2				MIR5680						LOC101927045
																					RNA5S3				LINC00536						LOC101929572
																					RNA5S4				FSBP						LOC101929718
																					RNA5S5				LINC00534						MIR6717
																					RNA5S6				CA3-AS1						MIR7703
																					RNA5S7				LOC101927066						LOC102724814
																					RNA5S9				UBR5-AS1						MHRT
																					RNA5S10				LINC01608						BMS1P22
																					RNA5S11				LINC01609
																					RNA5S12				LOC101927513
																					RNA5S13				LOC101927543
																					RNA5S14				LOC101929709
																					RNA5S15				LINC01030
																					RNA5S16				MIR7641-2
																					RNA5S17				MIR548AZ
																					LINC00582				MIR7705
																					LGALS8-AS1				MIR8084
																					MIR1182				LOC102723322
																					MIR1537				ZFPM2-AS1
																					LINC00184				LOC102724710
																					TSNAX-DISC1				LOC102724804
																					MIR3123				LOC104054148
																					MIR3124				LOC105375650
																					MIR3916				LOC105375713
																					LINC01354
																					LINC01132
																					CHRM3-AS2
																					ZNF670-ZNF695
																					MIR4428
																					MIR4753
																					MIR4454
																					MIR4666A
																					MIR4677
																					MIR4671
																					MIR4427
																					MIR5096
																					CHRM3-AS1
																					LOC101927478
																					LOC101927532
																					LOC101927604
																					LOC101927683
																					LOC101927765
																					LOC101927787
																					LOC101927851
																					LOC101928068
																					LOC101928226
																					MIR6742
																					MIR7641-2
																					DISC1-IT1
																					SNORA100

## Sheet: C4_amp_genes.conf_90
cytoband	11q13.3	5p15.33	8q24.22	1q21.3	17q23.2	1q32.3	6q12	6p21.1	17q25.1	17p11.2	13q34	5q34	19q12	11q13.2	15q26.3	1q42.3	1q24.1	11q13.4	5p14.1	18q22.3	6p25.3	5p13.2	19p13.12	3q26.31	10p11.22	9q34.2	7q36.1	13q32.3
q value	1.4515e-05	0.0027104	0.0027104	0.0027104	0.0027104	0.011996	0.017097	0.031967	0.0038977	0.037528	0.0059338	0.048349	0.056795	0.0027104	0.082025	0.035663	0.0043401	0.012407	0.089842	0.13193	0.17071	0.12563	0.1762	0.1919	0.1975	0.22091	0.22949	0.013715
residual q value	4.5657e-05	0.0027104	0.0027104	0.0041287	0.0087204	0.017097	0.017097	0.031967	0.033481	0.037528	0.039381	0.048349	0.056795	0.064102	0.082025	0.082156	0.082482	0.1016	0.1244	0.13193	0.17071	0.17454	0.1762	0.1919	0.1975	0.22091	0.22949	0.22949
wide peak boundaries	chr11:69333058-69340623	chr5:1002506-1287424	chr8:108008043-145138636	chr1:150940121-151268065	chr17:62000310-62142882	chr1:214015211-214133621	chr6:64565692-65480282	chr6:43681785-44186315	chr17:72832548-83257441	chr17:18957451-19312566	chr13:108634225-111851550	chr5:166024043-166243917	chr19:29754496-29938580	chr11:66852334-66890009	chr15:99606460-101991189	chr1:234948297-234969180	chr1:152652673-186088248	chr11:74276434-74288359	chr5:25595423-27690968	chr18:74174751-74253177	chr6:1-7464921	chr5:36143291-36171934	chr19:14522868-17345413	chr3:172550069-172573813	chr10:33272633-36287778	chr9:134245250-134261527	chr7:146819375-157577342	chr13:88740160-114364328
genes in wide peak	MYEOV	TERT	ADCY8	PSMD4	MED13	PROX1	EYS	VEGFA	AANAT	GRAP	COL4A1	CTB-7E3.1	CCNE1	PC	ALDH1A3	LOC101927851	hsa-mir-3119-1	P4HA3	CDH9	CYB5A	BPHL	SKP2	NR2F6	TNFSF10	CREM	RXRA	hsa-mir-1975	ATP4B
		SLC12A7	ANXA13	VPS72			LOC441155	CAPN11	ACOX1	EPN2	COL4A2		URI1	LRFN4	MEF2A		ABL2		LINC01021		SERPINB1	LMBRD2	DNAJB1		FZD8		AOC1	COL4A1
		NKD2	ADGRB1	PIP5K1A				MRPS18A	ACTG1	SNORD3B-1	ING1				PCSK6		ADAR				F13A1	MIR580	CYP4F3		CUL2		CDK5	COL4A2
		SLC6A19	CYC1	ANXA9				TMEM63B	BIRC5	SLC5A10	IRS2				SNRPA1		ALDH9A1				FOXF2		RAB8A		NRP1		DPP6	DCT
		SLC6A18	CYP11B1	SETDB1				MRPL14	ARHGDIA	LOC388436	ARHGEF7				CHSY1		APCS				FOXC1		MYO9B		PARD3		EN2	GPR183
		MIR4635	CYP11B2	SEMA6C				C6orf223	CD7	GRAPL	MYO16				OR4F4		APOA2				GMDS		NDUFB7		GJD4		EZH2	EFNB2
		CTD-3080P12.3	EEF1D	MLLT11				LINC01512	CDK3	FAM83G	ANKRD10				LINS1		FASLG				IRF4		NOTCH3		CCNY		GBX1	ERCC5
			EXT1	TMOD4				LOC101929705	CSNK1D	SNORD3A	RAB20				VIMP		ASTN1				NQO2		SLC1A6		MIR3611		MNX1	F7
			GLI4	CERS2					SLC25A10	SNORD3C	NAXD				LRRK1		SERPINC1				SERPINB6		TPM4		LINC00838		HTR5A	F10
			GML	C1orf56					EVPL	SNORD3D	CARS2				TM2D3		ATP1A2				SERPINB9		CYP4F2		PARD3-AS1		INSIG1	FGF14
			GPR20	FAM63A					FASN	EPN2-AS1	TEX29				TARSL2		ATP1A4				RREB1		AP1M1		MIR4683		KCNH2	GPC5
			GPT	CDC42SE1					FDXR	EPN2-IT1	LINC00567				ASB7		ATP1B1				SSR1		F2RL3		PCAT5		NOS3	GAS6
			GRINA	PRUNE1					FOXJ1		LINC00346				LYSMD4		BGLAP				TUBB2A		MED26				PTPRN2	GPR18
			HAS2	SCNM1					GAA		COL4A2-AS2				ADAMTS17		CACNA1E				RIPK1		TECR				RARRES2	ING1
			HSF1	TNFAIP8L2					GALK1		COL4A2-AS1				DNM1P46		CASQ1				PRPF4B		AKAP8				RHEB	IPO5
			EIF3E	GABPB2					GCGR		ARHGEF7-AS1				CERS3		CD1A				CDYL		KLF2				RNY1	LAMP1
			KCNQ3	BNIPL					UTS2R		ARHGEF7-AS2				WASH3P		CD1B				LY86		CHERP				RNY3	LIG4
			LY6E	LYSMD1					GPS1		MYO16-AS1				SPATA41		CD1C				ECI2		ILVBL				RNY4	PCCA
			LY6H	TNFAIP8L2-SCNM1					GRB2		LOC101060553				OR4F6		CD1D				FARS2		CYP4F8				RNY5	DNAJC3
			MYC						GRIN2C		LINC00676				OR4F15		CD1E				RPP40		SIN3B				SHH	RAP2A
			NDUFB9						H3F3B		LINC00368				OR4F13P		CD247				FAM50B		BRD4				SLC4A2	GRK1
			TONSL						MRPL58		MIR8073				LOC400464		CD5L				NRN1		CASP14				SMARCD3	SLC10A2
			NOV						FOXK2		LINC00399				PRKXP1		CD48				EXOC2		FAM32A				XRCC2	SLC15A1
			TNFRSF11B						ITGB4		LINC00431				FAM138E		CHRNB2				WRNIP1		OR7A17				ZNF212	SOX1
			ENPP2						LGALS3BP		LINC00396				LOC100128108		CKS1B				DUSP22		OR10H3				ZNF282	TFDP1
			PLEC						LLGL2		LOC105370369				DDX11L9		CLK2				LYRM4		OR10H2				CUL1	TPP2
			POU5F1B						MAFG						MIR1302-2		COPA				SLC22A23		OR10H1				ASIC3	ZIC2
			PTK2						NPTX1						MIR1302-9		CRABP2				RIOK1		OR7C2				PDIA4	STK24
			PVT1						P4HB						MIR1302-10		CRP				FOXQ1		OR7A5				UBE3C	CUL4A
			RAD21						PDE6G						MIR1302-11		DHX9				HUS1B		OR7C1				DNAJB6	IRS2
			RPL8						PRPSAP1						LOC100507472		DPT				LINC01600		AKAP8L				ABCF2	PROZ
			ST3GAL1						PYCR1						LOC101927751		EFNA1				PXDC1		CPAMD8				FASTK	ARHGEF7
			SLA						PCYT2						MIR6859-2		EFNA3				SERPINB9P1		BABAM1				ABCB8	CDC16
			SNTB1						RAC3						MIR6859-3		EFNA4				FAM217A		ADGRE2				PAXIP1	CLDN10
			SQLE						RFNG						MIR6859-1		ETV3				LOC285766		USE1				SSPO	ITGBL1
			TAF2						RPL38						CERS3-AS1		F5				LINC01622		ANO8				CNTNAP2	TM9SF2
			TG						MRPL12						LOC102723335		FCER1A				LY86-AS1		CYP4F11				GIMAP2	GPC6
			TRHR						SEC14L1						PCSK6-AS1		FCER1G				CAGE1		EPS15L1				ZNF777	MBNL2
			TRPS1						SECTM1								FCGR2A				MYLK4		WIZ				TMEM176B	FARP1
			TSTA3						SRSF2								FCGR2B				TUBB2B		RASAL3				REPIN1	ABCC4
			COL14A1						SGSH								FCGR3A				PSMG4		MRPL34				PRKAG2	TUBGCP3
			ZNF7						SUMO2								FCGR3B				LINC01011		CYP4F12				NUB1	TNFSF13B
			ZNF16						SRP68								FDPS				HTATSF1P2		DDA1				CHPF2	SOX21
			PSCA						SSTR2								FMO1				C6orf201		TMEM38A				GIMAP4	RASA3
			LY6D						TBCD								FMO2				LINC00266-3		SMIM7				GIMAP5	DZIP1
			JRK						TIMP2								FMO3				KU-MEL-3		ABHD8				TMEM176A	MYO16
			EIF3H						TK1								FMO4				PPP1R3G		OCEL1				ACTR3B	ATP11A
			DGAT1						CBX4								ACKR1				LYRM4-AS1		EPHX3				ZNF398	MCF2L
			GPAA1						DNAH17								GBA				MIR3691		SLC35E1				KMT2C	DOCK9
			WISP1						GALR2								GBAP1				LOC100507194		USHBP1				GALNT11	TGDS
			FOXH1						SPHK1								GLUL				LOC100507506		C19orf44				LMBR1	OXGR1
			EBAG9						SOCS3								HDGF				GMDS-AS1		ZNF333				LINC00244	BIVM
			RECQL4						SLC16A5								MR1				MIR4645		ADGRE3				NOM1	TMCO3
			LRRC14						SLC16A3								HSPA6				MIR5683		GTPBP3				LRRC61	ARGLU1
			EMC2						SYNGR2								HSPA7				LOC101927691		HSH2D				ZNF767P	DCUN1D2
			MTSS1						HGS								IFI16				FOXCUT		SYDE1				TMUB1	ANKRD10
			ZNF623						CYTH1								IL6R				LOC101927730		HAUS8				KRBA1	RAB20
			KIAA0196						SLC9A3R1								ILF2				LOC101927759		PGLYRP2				ZBED6CL	NAXD
			HHLA1						COG1								INSRR				LOC101927950		CIB3				AGAP3	UGGT2
			TRIB1						RECQL5								IVL				LOC101927972		CALR3				C7orf13	PCID2
			NDRG1						PGS1								KCNJ9				MIR7641-2		OR1I1				ZNF786	UPF3A
			COLEC10						AATK								KCNJ10				MIR6720		CCDC105				ASB10	KDELC1
			KHDRBS3						TMEM94								KCNN3				MIR7853		CYP4F22				RNF32	CARS2
			PTP4A3						EIF4A3								LAMC1				LOC102724096		LINC00661				GIMAP8	GRTP1
			RNF139						ALYREF								LAMC2						OR10H4				CRYGN	TMTC4
			ZHX1						BAIAP2								LMNA						ANKLE1				ZNF425	ABHD13
			PUF60						ATP5H								LMX1A						LINC00905				LOC155060	ZIC5
			ZHX2						ST6GALNAC2								LOR						OR10H5				ZNF746	GGACT
			DENND3						2021-09-09								LY9						NWD1				ATP6V0E2	TEX30
			ZC3H3						CD300C								SMCP						CLEC17A				RBM33	ADPRHL1
			EFR3A						RAB40B								MEF2D						CYP4F24P				GALNTL5	TEX29
			ARC						CD300A								MGST3						OR7A10				GIMAP7	METTL21EP
			BOP1						TMC6								MNDA						UCA1				ZNF467	SPACA7
			SCRIB						CEP131								MPZ						MIR639				GIMAP1	RNF113B
			LRRC6						GGA3								MTX1						MIR1470				PAXIP1-AS1	LINC00410
			FBXL6						JMJD6								MUC1						MIR6795				C7orf33	LINC00343
			OPLAH						EXOC7								MYOC						LOC102724279				FABP5P3	GPR180
			KCNV1						KCTD2								NCF2						SNORA104				CNPY1	CLYBL
			MTBP						WBP2								NDUFS2										LOC285889	METTL21C
			AGO2						CDC42EP4								NHLH1										ZNF775	NALCN
			COMMD5						FSCN2								NIT1										LINC00996	HS6ST3
			MRPL13						NAT9								NPR1										ATG9B	DAOA
			ATAD2						NARF								NTRK1										BLACE	DAOA-AS1
			ASAP1-IT1						SAP30BP								DDR2										WDR86	FGF14-IT1
			CPSF1						NT5C								PBX1										LOC389602	FGF14-AS2
			CYHR1						CDR2L								PFDN2										IQCA1L	LINC00551
			ASAP1						MRPS7								PIGC										ATP6V0E2-AS1	LINC00567
			FAM135B						HN1								PKLR										MIR153-2	LINC00346
			PHF20L1						DCXR								PRRX1										GIMAP6	CHAMP1
			VPS28						ANAPC11								POU2F1										ZNF862	UBAC2
			HGH1						SIRT7								PPOX										MNX1-AS1	TMEM255B
			KCNK9						SDK2								PRCC										ACTR3C	ATP11AUN
			THEM6						TMEM104								QSOX1										LOC728743	MIR17
			FAM49B						C17orf80								PEX19										MIR671	MIR18A
			CHRAC1						CCDC40								RAB13										HTR5A-AS1	MIR19A
			EXOSC4						NPLOC4								RGS4										LINC01003	MIR19B1
			LY6K						ST6GALNAC1								RGS16										WDR86-AS1	MIR20A
			TRMT12						GPRC5C								RIT1										PAXIP1-AS2	MIR92A1
			WDYHV1						WDR45B								RNASEL										ZNF783	MIR17HG
			SLC39A4						CBX8								RNF2										MIR548F4	LINC00452
			SYBU						MIF4GD								RPS27										MIR3907	CCDC168
			GSDMC						CASKIN2								RXRG										PRKAG2-AS1	GAS6-AS1
			ENY2						RPTOR								S100A1										LOC100506302	MIR622
			SLURP1						BAHCC1								S100A2										LINC01006	MIR623
			SLC45A4						USP36								S100A3										GIMAP1-GIMAP5	LINC00460
			ZFAT						RNF213								S100A4										LOC101927914	FAM155A
			ZNF250						TNRC6C								S100A5										LOC101928700	COL4A2-AS2
			DEPTOR						SLC25A19								S100A6										LOC101929998	LINC00552
			PYCRL						UBE2O								S100A7										GHET1	FKSG29
			C8orf33						DUS1L								S100A8										LINC01287	DNAJC3-AS1
			LYNX1						FN3K								S100A9										LOC105375556	UBAC2-AS1
			RHPN1-AS1						DNAI2								S100A12											MCF2L-AS1
			DSCC1						ENGASE								S100A13											MIR1267
			DERL1						MRPL38								XCL1											MIR4306
			SLC52A2						ASPSCR1								SDHC											MIR3170
			GSDMD						CARD14								SELE											LINC00403
			ZNF696						MFSD11								SELL											LOC100506016
			ARHGAP39						C17orf62								SELP											GAS6-AS2
			ZNF34						ARMC7								SHC1											SOX21-AS1
			SHARPIN						CHMP6								SLAMF1											BIVM-ERCC5
			EPPK1						RHBDF2								SOAT1											MIR2681
			SCRT1						FN3KRP								UAP1											MIR4501
			TRAPPC9						OGFOD3								SPRR1A											MIR4502
			TATDN1						ZNF750								SPRR1B											MIR4705
			MAF1						NUP85								SPRR2A											MIR548AR
			UTP23						MYO15B								SPRR2B											MIR548AS
			PARP10						FAAP100								SPRR2C											DOCK9-AS2
			C8orf76						TSPAN10								SPRR2D											LINC00554
			TIGD5						QRICH2								SPRR2E											LINC00557
			NUDCD1						CBX2								SPRR2F											LINC00565
			FAM83A						FAM104A								SPRR2G											GPC5-AS1
			PPP1R16A						MGC16275								SPRR3											GPC5-AS2
			MED30						FBF1								SPTA1											GPC6-AS1
			ZNF251						UNK								SSR2											GPC6-AS2
			KIFC2						TRIM47								XCL2											CLYBL-AS2
			PKHD1L1						MAFG-AS1								THBS3											GRTP1-AS1
			NAPRT						OTOP2								TNR											FGF14-AS1
			TBC1D31						TTYH2								TOP1P1											DOCK9-AS1
			HPYR1						CYGB								TPM3											LINC00353
			MFSD3						RNF157								CCT3											LINC00379
			MAL2						C1QTNF1								TNFSF4											LINC00411
			CSMD3						PPP1R27								UCK2											LINC00440
			RHPN1						METTL23								USF1											LINC00443
			FBXO32						SLC38A10								DAP3											LINC00454
			TOP1MT						CANT1								NPHS2											LINC00559
			CCDC26						USH1G								TAGLN2											CLDN10-AS1
			ZNF572						CD300LB								RGS5											COL4A2-AS1
			LYPD2						KIF19								BLZF1											ATP11A-AS1
			TMEM71						TBC1D16								VAMP4											ARHGEF7-AS1
			FER1L6-AS2						AFMID								PEA15											ARHGEF7-AS2
			TMEM65						MGAT5B								B4GALT3											FAM155A-IT1
			LINC00964						TEPSIN								ADAM15											PCCA-AS1
			FAM84B						B3GNTL1								CREG1											NALCN-AS1
			TMEM74						RBFOX3								CD84											MYO16-AS1
			FAM91A1						CD300LF								TNFSF18											LINC00359
			SLC30A8						C17orf77								MPZL1											LOC101060553
			COL22A1						NOTUM								SH2D2A											LINC00676
			ADCK5						TMC8								ANGPTL1											LINC01049
			TSNARE1						CENPX								TBX19											LOC101927248
			MAPK15						LRRC45								FCGR2C											LOC101927284
			NSMCE2						SLC39A11								ARHGEF2											LOC101927437
			ZNF707						TRIM65								DEDD											CLYBL-AS1
			BREA2						UNC13D								XPR1											LINC00368
			FAM83H						MYADML2								GPR52											LINC00354
			LINC01591						NPB								AIM2											LINC01070
			ZNF252P						LINC00469								RASAL2											LOC101928730
			TMED10P1						FADS6								ADAMTS4											LINC01043
			ZNF252P-AS1						HID1								PRDX6											LOC101928841
			C8orf31						TSEN54								SLC25A44											LINC00380
			ZFP41						UBALD2								KIAA0040											MIR8073
			GPIHBP1						LINC00868								NOS1AP											MIR8075
			KLHL38						TMEM235								ARHGEF11											LINC01232
			NRBP2						CCDC57								CEP350											LINC00456
			ZNF517						HEXDC								SMG7											LINC01044
			WDR97						SLC26A11								UBAP2L											LINC00363
			TMEM249						ENDOV								DENND4B											LINC00399
			RSPO2						NDUFAF8								RABGAP1L											LINC01309
			SPATC1						LINC00482								FAM20B											LINC00431
			MROH5						TMEM105								NR1I3											LINC00396
			MAFA						METRNL								SCAMP3											LINC01039
			SAMD12						RAB37								ARPC5											LINC01054
			MIR30B						ENPP7								GPA33											F10-AS1
			MIR30D						OXLD1								STX6											LINC01040
			C8orf82						CCDC137								HAX1											LOC105370333
			FER1L6-AS1						ARL16								C1orf61											LOC105370369
			AARD						CD300E								SLC19A2											LINC01047
			LRRC24						OTOP3								IVNS1ABP											LINC00449
			MIR151A						MCRIP1								PMVK
			NCRNA00250						GPR142								FAM189B
			SAMD12-AS1						ZACN								NES
			ZFAT-AS1						BTBD17								JTB
			HAS2-AS1						AATK-AS1								SLC27A3
			LINC00051						RPL23AP87								PMF1
			TMEM75						LOC400620								DUSP12
			MROH6						FLJ45079								KIAA0907
			SCX						TEX19								KIFAP3
			RAD21-AS1						MXRA7								ATF6
			FER1L6						BAIAP2-AS1								NMNAT2
			MIR548D1						MIR338								COLGALT2
			MIR661						CPSF4L								RGL1
			CASC8						SMIM5								SYT11
			MROH1						SNHG20								PRRC2C
			LINC00977						SCARNA16								SMG5
			OC90						SNORD1A								NCSTN
			LINC01300						SNORD1B								GPR161
			MIR937						SNORD1C								SNAPIN
			MIR939						MIR636								RUSC1
			FAM83H-AS1						MIR657								CFAP45
			CDC42P3						PRCD								MPC2
			LINC00861						LOC100130370								OLFML2B
			CCDC166						LOC100130520								C1orf43
			FAM83A-AS1						SMIM6								DNM3
			LOC100132813						TNRC6C-AS1								TOR1AIP1
			LOC100133669						CD300LD								CHTOP
			CASC11						LOC100132174								LCE2B
			TONSL-AS1						LOC100134391								OR10J1
			LOC100288181						TEN1								SNORD81
			MIR1302-7						C17orf99								SNORD79
			MIR1205						LOC100287042								SNORD80
			MIR1206						LOC100294362								SNORD47
			MIR1207						MIR1250								SNORD44
			MIR1204						MIR4316								USP21
			MIR1234						MIR3065								CACYBP
			MIR2053						MIR3186								SLC39A1
			MIR1208						MIR3678								KLHL20
			MIR3686						MIR3615								LAMTOR2
			MIR548AA1						RNF157-AS1								NME7
			MIR3610						SNHG16								DCAF8
			CCAT1						LOC100507351								F11R
			ASAP1-IT2						C1QTNF1-AS1								ZBTB7B
			MINCR						TEN1-CDK3								RRNAD1
			ZHX1-C8orf76						MIR1268B								IER5
			MIR4662A						MIR4739								SUCO
			MIR4662B						MIR4525								HSD17B7
			MIR4663						MIR4738								UFC1
			MIR4472-1						MIR4740								METTL13
			MIR4664						MIR4730								CD244
			PCAT1						HP09025								DPM3
			MIR5194						CEP295NL								TMCO1
			LINC00536						LOC100996291								SWT1
			CCAT2						DNAH17-AS1								GON4L
			PRNCR1						LOC101928251								GPATCH4
			LINC01608						LOC101928514								DUSP23
			LINC01609						LOC101928674								RALGPS2
			LOC101927513						LOC101928710								MSTO1
			LOC101927543						LOC101928738								DARS2
			LOC101927588						LOC101928766								KIRREL
			RNF139-AS1						LOC101928855								YY1AP1
			LOC101927657						LOC101929511								UBE2Q1
			LINC00824						LOC101929552								ITLN1
			LOC101927798						MIR6786								C1orf112
			LOC101927822						MIR6787								ADCY10
			LOC101927845						MIR6868								DCAF6
			LOC101927915						MIR6516								ASH1L
			LOC101928087						MIR6785								LENEP
			LOC101928160						HID1-AS1								SLC50A1
			LOC101928902						LOC105274304								SLAMF8
			MIR6846						LOC105371899								UBQLN4
			MIR6847						LOC105371907								RAB25
			MIR6848						LOC105371925								PGLYRP4
			MIR7112						SNORD134								RHBG
			MIR6850														SCYL3
			MIR548AZ														ATP8B2
			MIR6844														VANGL2
			MIR6893														PBXIP1
			MIR6845														S100A14
			MIR6849														GATAD2B
			MIR7848														IGSF9
			CASC21														POGK
			CASC19														HCN3
			PCAT2														KIAA1614
			LINC01151														BRINP2
			MAFA-AS1														CCDC181
			LOC105375713														SLAMF7
			LOC105375734														CADM3
			LOC105375744														HAPLN2
			LOC105375773														GAS5
			LOC105375787														PAPPA2
			LOC105375800														BCAN
																	TNN
																	MRPS14
																	SEMA4A
																	TOR3A
																	RFWD2
																	INTS3
																	LINC00626
																	FCRL2
																	MRPL24
																	PAQR6
																	TRIM46
																	MROH9
																	EDEM3
																	FLAD1
																	NPL
																	OR6N2
																	OR6K2
																	C1orf21
																	NECTIN4
																	SHCBP1L
																	TRMT1L
																	ISG20L2
																	FCRL5
																	FCRL4
																	NUF2
																	HMCN1
																	TEX35
																	TOMM40L
																	TMEM79
																	ACBD6
																	ZBTB37
																	FCRLA
																	ANKRD36BP1
																	MAEL
																	RGS8
																	SEC16B
																	AQP10
																	LHX4
																	SLAMF9
																	PYGO2
																	NUP210L
																	CENPL
																	DUSP27
																	RCSD1
																	MEX3A
																	METTL18
																	GORAB
																	C1orf105
																	PIGM
																	IGSF8
																	GLMP
																	PGLYRP3
																	SLAMF6
																	FCRL1
																	FCRL3
																	FMO9P
																	TSEN15
																	FAM129A
																	TADA1
																	SH2D1B
																	TDRD10
																	SHE
																	KLHDC9
																	AXDND1
																	OR10J5
																	DCST2
																	ZNF648
																	TEDDM1
																	UHMK1
																	FCRLB
																	TSACC
																	IQGAP3
																	NAXE
																	OR10T2
																	OR6P1
																	OR10X1
																	OR10Z1
																	OR6K6
																	OR6N1
																	S100A16
																	ITLN2
																	CREB3L4
																	FAM163A
																	OVAAL
																	LELP1
																	RC3H1
																	DCST1
																	METTL11B
																	FAM78B
																	LRRC71
																	PYHIN1
																	TDRD5
																	TOR1AIP2
																	SPRR4
																	TTC24
																	LCE4A
																	FLJ23867
																	KRTCAP2
																	CRTC2
																	ARHGAP30
																	CFAP126
																	TIPRL
																	SLC9C2
																	RUSC1-AS1
																	LOC284648
																	SMG7-AS1
																	C1orf204
																	C1orf111
																	LINC01142
																	S100A7A
																	RXFP4
																	ANKRD45
																	CCDC190
																	LOC343052
																	OR10R2
																	FCRL6
																	LCE1A
																	LCE1B
																	LCE1C
																	LCE1D
																	LCE1E
																	LCE1F
																	LCE2A
																	LCE2C
																	LCE2D
																	RGSL1
																	CYCSP52
																	PEAR1
																	SFT2D2
																	ILDR2
																	C1orf189
																	FMO6P
																	LINC00272
																	VHLL
																	OR10K2
																	OR10K1
																	OR6Y1
																	OR6K3
																	VSIG8
																	C1orf226
																	LOC400794
																	C1orf220
																	LINC01344
																	APOBEC4
																	MIR199A2
																	MIR214
																	MIR9-1
																	ETV3L
																	LRRC52
																	LOC440700
																	OR10J3
																	KPRP
																	LCE6A
																	SUMO1P3
																	PRR9
																	MIR488
																	SNORD74
																	RPL31P11
																	ASH1L-AS1
																	POU5F1P4
																	S100A7L2
																	LOC646268
																	PCP4L1
																	SCARNA3
																	SCARNA4
																	SNORA80E
																	SNORD75
																	SNORD76
																	SNORD77
																	SNORD78
																	MIR555
																	MIR556
																	MIR557
																	MIR92B
																	LOC729867
																	LOC730102
																	LOC730159
																	MIR765
																	MIR190B
																	MIR921
																	C1orf68
																	MSTO2P
																	TSTD1
																	CADM3-AS1
																	LOC100147773
																	GM140
																	GS1-279B7.1
																	MIR1295A
																	RASAL2-AS1
																	MIR1255B2
																	LOC100422212
																	MIR3119-1
																	MIR4259
																	MIR3120
																	MIR3119-2
																	MIR4258
																	MIR3121
																	MIR3658
																	LINC01133
																	LOC100505666
																	LOC100505795
																	LOC100505918
																	LOC100506023
																	GAS5-AS1
																	PMF1-BGLAP
																	LHX4-AS1
																	MIR4424
																	MIR4654
																	DNM3OS
																	MIR1295B
																	MIR5698
																	MIR5187
																	UBE2Q1-AS1
																	DNM3-IT1
																	LOC101928009
																	LOC101928034
																	LOC101928120
																	LOC101928177
																	LOC101928372
																	LOC101928404
																	LINC01363
																	LOC101928565
																	LOC101928596
																	LOC101928650
																	LOC101928673
																	LOC101928696
																	LOC101928751
																	LOC101928778
																	LOC101928973
																	LINC01350
																	LINC00970
																	MIR6737
																	MIR6738
																	MIR8083
																	LOC102724601
																	LOC102724661
																	LOC105371458
																	SCARNA26A
																	SCARNA26B
																	SNORA103
																	POP3
